# Supplementary material
Source: publisher figshare collection journal article supplement (https://acs.figshare.com/ndownloader/files/4114849)
Supplement: Supplementary file 1 [file 4114849]

# Interactions of DPPC with semitelechelic poly(glycerol methacrylate)s with perfluoroalkyl endgroups

*Peggy Scholtysek, Zheng Li, Jörg Kressler, Alfred Blume\**

Institute of Chemistry, Martin-Luther University Halle-Wittenberg, D-06120 Halle (Saale),  
Germany

## SUPPORTING INFORMATION

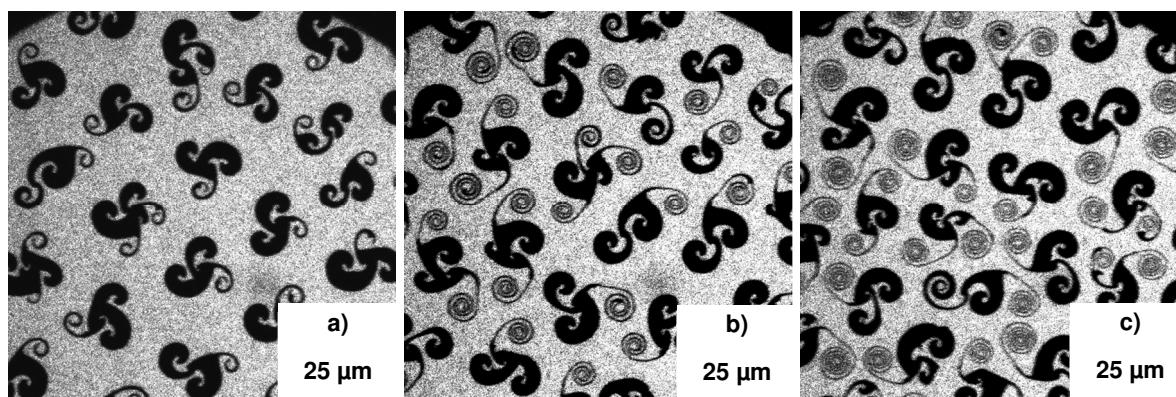

**Figure S1.** Epi-Fluorescence microscopy images of monolayers of D-DPPC:PGMA<sub>90</sub>-F<sub>9</sub> = 10:1. Images were taken during constant compression of the co-spread monolayer. a) 8.7 mN m<sup>-1</sup>; b) 9.5 mN m<sup>-1</sup>; c) 9.5 mN m<sup>-1</sup> (T = 20 °C).

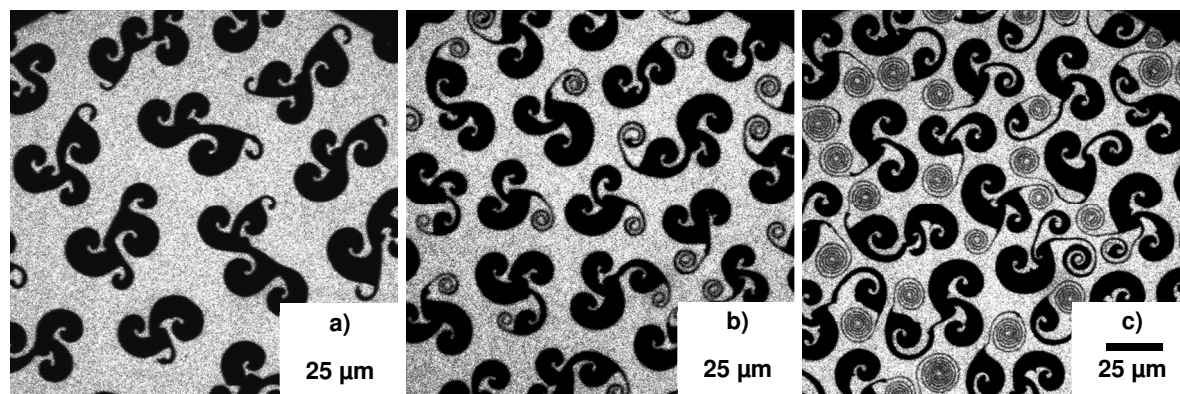

**Figure S2.** Epi-Fluorescence microscopy images of monolayers of D-DPPC:PGMA<sub>40</sub>-F<sub>9</sub> = 10:1. Images were taken during constant compression of the co-spread monolayer. a) 8.6 mN m<sup>-1</sup>; b) 9.2 mN m<sup>-1</sup>; c) 9.9 mN m<sup>-1</sup> (T = 20 °C).

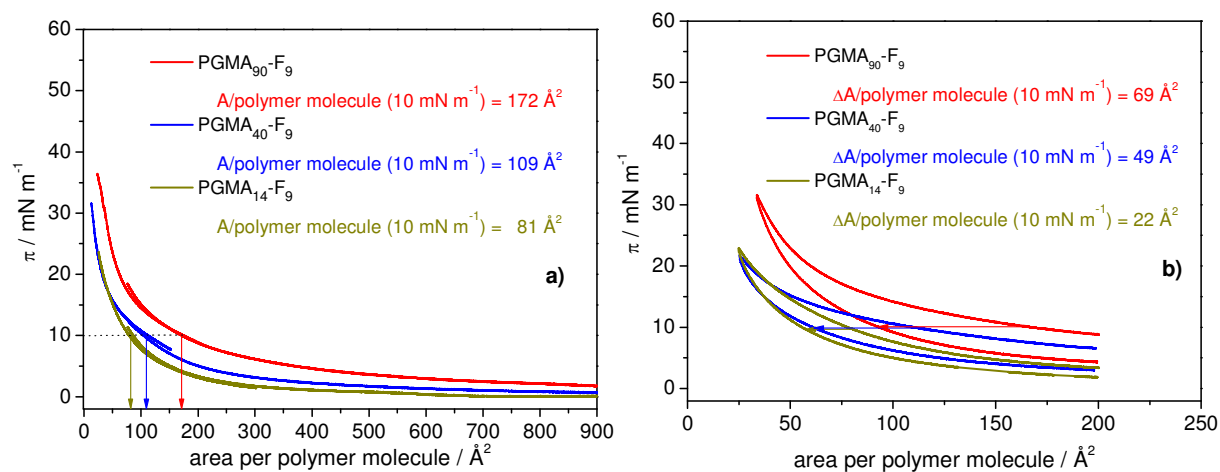

**Figure S3.** Isotherms for PGMA<sub>n</sub>-F<sub>9</sub> monolayers after spreading from a solution in methanol: a) isotherms obtained during compression; b) isotherms for a compression and expansion cycle showing characteristic hysteresis loops due to the non-equilibrium situation in the compression cycle.
